# Supplementary material for: Unremarked or Unperformed? Systematic Review on Reporting of Validation Efforts of Health Economic Decision Models in Seasonal Influenza and Early Breast Cancer
Source: Springer Nature journal article supplement (doi:10.1007/s40273-016-0410-3), 2016-04-29
Supplement: MOESM1 [file 24130028]

## **Appendix 1: Search strings used for the study selection.**

### *Seasonal influenza*

Pubmed: (((("Influenza, Human"[Mesh] OR influenza[tw] OR flu[tw]) AND ("Costs and Cost Analysis"[Mesh] OR cost-effectiveness[tw] OR cost-utility[tw] OR cost-benefit[tw] OR cost-effective[tw] OR cost[tw] OR costs[tw] OR economic evaluation[tw] OR economic analysis[tw] OR economics[tw] OR icer[tw] OR icur[tw] OR incremental net monetary benefit[tw] OR incremental-net-monetary-benefit[tw] OR inmb[tw] OR incremental net health benefit[tw] OR incremental-net-health-benefit[tw] OR inhb[tw] OR "Quality-Adjusted Life Years"[Mesh] OR qaly[tw] OR qalys[tw] OR quality adjusted life year[tw] OR quality-adjusted life year[tw] OR quality-adjusted life years[tw] OR quality adjusted life years[tw])) AND (("2008/01/01"[PDat] : "3000/12/31"[PDat]))) AND ("Models, Economic"[Mesh] OR model\*[tw] OR markov[tw] OR decision tree[tw] OR simulat\*[tw] OR DES[tw] OR dynamic[tw] OR agent[tw] OR compartment[tw] OR transition[tw]) NOT ("animals"[MeSH] NOT "humans"[MeSH]))

Embase: ('influenza'/exp OR influenza:ab,ti OR flu:ab,ti) AND ('economic evaluation'/exp OR 'cost-effectiveness':ab,ti OR 'cost-utility':ab,ti OR 'cost-benefit':ab,ti OR 'cost-effective':ab,ti OR cost:ab,ti OR costs:ab,ti OR 'economic evaluation':ab,ti OR 'economic analysis':ab,ti OR economics:ab,ti OR icer:ab,ti OR icur:ab,ti OR 'incremental net monetary benefit':ab,ti OR 'incremental-net-monetary-benefit':ab,ti OR inmb:ab,ti OR 'incremental net health benefit':ab,ti OR 'incremental-net-health-benefit':ab,ti OR inhb:ab,ti OR 'quality adjusted life year'/exp OR qaly:ab,ti OR qalys:ab,ti OR 'quality adjusted life year':ab,ti OR 'quality-adjusted life year':ab,ti OR 'quality-adjusted life years':ab,ti) AND (model\*:ab,ti OR markov:ab,ti OR 'decision tree':ab,ti OR simulat\*:ab,ti OR des:ab,ti OR dynamic:ab,ti OR 'agent based':ab,ti OR 'agent-based':ab,ti OR compartment:ab,ti OR transition:ab,ti ) AND [2008-2015]/py NOT ([animals]/lim NOT [humans]/lim)

### *Breast cancer*

Pubmed: ("Breast Neoplasms"[Mesh] OR breast cancer[tw] OR mammary cancer[tw] OR breast tumor[tw] OR mammary carcinoma[tw] OR breast neoplasm[tw]) NOT (metastatic[tw] AND screening[tw]) AND (adjuvant[tw] OR early[tw] OR primary[tw]) AND ("Costs and Cost Analysis"[Mesh] OR cost-effectiveness[tw] OR cost-utility[tw] OR cost-benefit[tw] OR cost-effective[tw] OR cost[tw] OR costs[tw] OR economic evaluation[tw] OR

economic analysis[tw] OR economics[tw] OR icer[tw] OR icur[tw] OR incremental net monetary benefit[tw] OR incremental-net-monetary-benefit[tw] OR inmb[tw] OR incremental net health benefit[tw] OR incremental-net-health-benefit[tw] OR inhb[tw] OR "Quality-Adjusted Life Years"[Mesh] OR qaly[tw] OR qalys[tw] OR quality adjusted life year[tw] OR quality-adjusted life year[tw] OR quality-adjusted life years[tw] OR quality adjusted life years[tw]) AND (("2008/01/01"[PDat] : "2014/12/31"[PDat])) AND ("Models, Economic"[Mesh] OR model\*[tw] OR markov[tw] OR decision tree[tw] OR simulat\*[tw] OR DES[tw] OR dynamic[tw] OR agent[tw] OR compartment[tw] OR transition[tw]) NOT ("animals"[MeSH] NOT "humans"[MeSH])

Embase: 'breast cancer'/exp OR 'breast cancer' OR 'breast cancer':ab,ti OR 'mammary cancer':ab,ti OR 'breast tumor':ab,ti OR 'mammary carcinoma':ab,ti OR 'breast neoplasm':ab,ti AND ('economic evaluation'/exp OR 'economic evaluation' OR 'cost-effectiveness':ab,ti OR 'cost-utility':ab,ti OR 'cost-benefit':ab,ti OR 'cost-effective':ab,ti OR cost:ab,ti OR costs:ab,ti OR 'economic evaluation':ab,ti OR 'economic analysis':ab,ti OR economics:ab,ti OR icer:ab,ti OR icur:ab,ti OR 'incremental net monetary benefit':ab,ti OR 'incremental-net-monetary-benefit':ab,ti OR inmb:ab,ti OR 'incremental net health benefit':ab,ti OR 'incremental-net-health-benefit':ab,ti OR inhb:ab,ti OR 'quality adjusted life year'/exp OR 'quality adjusted life year' OR qaly:ab,ti OR qalys:ab,ti OR 'quality adjusted life year':ab,ti OR 'quality-adjusted life year':ab,ti OR 'quality-adjusted life years':ab,ti) AND (model\*:ab,ti OR markov:ab,ti OR 'decision tree':ab,ti OR simulat\*:ab,ti OR des:ab,ti OR dynamic:ab,ti OR 'agent based':ab,ti OR 'agent-based':ab,ti OR compartment:ab,ti OR transition:ab,ti) AND [2008-2014]/py NOT ([animals]/lim NOT [humans]/lim) NOT ('metastatic':ab,ti OR 'screening':ab,ti)
